# Supplementary material for: Reliability and validity of the six-minute step test in assessing the functional capacity of hemodialysis patients
Source: PeerJ. 2025 Jul 8;13:e19157. doi: 10.7717/peerj.19157 (PMC12248222; doi:10.7717/peerj.19157)
Supplement: Supplemental Information 1 — Sex, age, height, weight, 16MST, 26MST, best 6MST, and best 6MWT. These data were used for the main statistics of the study. 6MST—six-minute step test. 6MWT—six-minute walk test. [file peerj-13-19157-s001.xlsx]

## Sheet: Raw data
Patient	Sex	Age (years)	Height (cm)	Weight (Kg)	Body mass index	First 6MST	Second 6MST	Best 6MWT (meters)	Best 6MST (number of steps)
1	0	28	172	76.3	25.8	147	155	664	155
2	1	44	162	78.7	29.99	105	73	449	105
3	0	52	157	49.9	20.2	148	173	481	173
4	1	55	156	78.4	32.22	74	77	280	77
5	0	71	163	87.6	33	88	91	445	91
6	1	63	149	59.3	26.7	74	78	420	78
7	1	58	151	73	32	44	44	202	44
8	0	31	164	81.2	30.2	111	127	591	127
9	0	70	167	106.6	38.2	68	70	400	70
10	0	64	157	80.7	32.7	48	59	292	59
11	0	52	163	63	23.7	57	71	427	71
12	0	44	169	81.2	28.4	115	131	524	131
13	0	75	166	89.1	32.33	34	40	194	40
14	0	38	179	70.8	22.1	92	104	455	104
15	0	59	160	73.2	28.6	70	82	376	82
16	0	73	175	81.1	26.48	59	68	398	68
17	0	58	174	82	22.08	88	90	477	90
18	0	63	166	93	33.75	99	87	436	99
19	0	50	168	80.6	28.56	127	128	501	128
20	1	51	165	69.2	25.42	148	158	525	158
21	0	74	177	76.2	24.32	77	68	510	77
22	0	75	178	91.9	29.01	42	50	377	50
23	1	71	145	42.6	20.26	74	89	407	89
24	0	53	175	76	24.82	122	143	602	143
25	0	62	166	67.6	24.53	63	93	437	93
26	0	60	178	88.4	27.9	87	98	428	98
27	0	41	175	89.1	29.1	182	168	563.5	182
28	1	42	148	77.4	34.9	148	159	544	159
29	0	38	172	63.6	21.63	83	87	414	87
30	1	62	157	74.6	30.3	79	84	446	84
31	1	70	144	89.3	43.1	45	47	321	47
32	1	69	149	71.9	32.4	67	66	211	67
	0- male
	1- female
